# Supplementary material
Source: PubMed Central journal article supplement (PMC1857726)
Supplement: pgen.0030059.st003.pdf [file pgen.0030059.st003.pdf]

**Significantly over-represented overlapping gene ontology processes in the tissue comparisons in mouse and man. Only categories where the number of probesets in either mouse or human data was >10 are included.**

A: human cortex-caudate and mouse cortex-striatum GO processes containing probesets with reduced RNA levels in human and mouse cortex compared with human caudate and mouse striatum respectively

| GO ID | Human                 |          | Mouse                 |          | Function                                                           |
|-------|-----------------------|----------|-----------------------|----------|--------------------------------------------------------------------|
|       | # sig/total probesets | p-value  | # sig/total probesets | p-value  |                                                                    |
| 6412  | 141/ 389              | 0.00E+00 | 76/ 565               | 7.34E-14 | protein biosynthesis                                               |
| 6414  | 13/ 29                | 2.71E-08 | 6/ 38                 | 2.59E-02 | translational elongation                                           |
| 8360  | 11/ 34                | 1.32E-04 | 18/ 118               | 1.45E-05 | regulation of cell shape                                           |
| 30036 | 22/ 92                | 2.19E-04 | 14/ 127               | 9.66E-03 | actin cytoskeleton organization and biogenesis                     |
| 6869  | 17/ 77                | 3.27E-03 | 15/ 95                | 3.60E-05 | lipid transport                                                    |
| 6730  | 11/ 45                | 5.15E-03 | 13/ 69                | 4.41E-06 | one-carbon compound metabolism                                     |
| 6936  | 24/ 126               | 7.48E-03 | 7/ 44                 | 1.60E-02 | muscle contraction                                                 |
| 8277  | 11/ 47                | 8.13E-03 | 3/ 13                 | 4.04E-02 | regulation of G-protein coupled receptor protein signaling pathway |
| 42135 | 5/ 12                 | 9.54E-03 | 3/ 8                  | 9.94E-03 | neurotransmitter catabolism                                        |
| 187   | 7/ 22                 | 1.19E-02 | 9/ 53                 | 4.33E-03 | activation of MAPK activity                                        |
| 30154 | 58/ 369               | 1.38E-02 | 55/ 624               | 1.94E-03 | cell differentiation                                               |
| 6629  | 46/ 286               | 1.67E-02 | 36/ 293               | 3.95E-06 | lipid metabolism                                                   |
| 6397  | 17/ 90                | 2.23E-02 | 50/ 424               | 3.62E-07 | mRNA processing                                                    |
| 6376  | 6/ 20                 | 2.61E-02 | 12/ 60                | 3.09E-06 | mRNA splice site selection                                         |
| 6334  | 14/ 73                | 2.98E-02 | 15/ 86                | 4.96E-06 | nucleosome assembly                                                |
| 45786 | 24/ 144               | 4.27E-02 | 13/ 115               | 9.34E-03 | negative regulation of progression through cell cycle              |
| 51016 | 10/ 46                | 4.37E-02 | 13/ 63                | 6.40E-07 | barbed-end actin filament capping                                  |
| 910   | 6/ 23                 | 4.99E-02 | 5/ 30                 | 3.29E-02 | cytokinesis                                                        |

B: human cortex-caudate and mouse cortex-striatum GO processes containing probesets with increased RNA levels in human and mouse cortex compared with human caudate and mouse striatum respectively

| GO ID | Human                 |          | Mouse                 |          | Function                                                              |
|-------|-----------------------|----------|-----------------------|----------|-----------------------------------------------------------------------|
|       | # sig/total probesets | p-value  | # sig/total probesets | p-value  |                                                                       |
| 6886  | 94/ 310               | 5.61E-15 | 66/ 491               | 1.24E-08 | intracellular protein transport                                       |
| 15986 | 26/ 53                | 1.14E-12 | 16/ 60                | 1.37E-09 | ATP synthesis coupled proton transport                                |
| 7018  | 31/ 71                | 3.86E-12 | 30/ 140               | 1.33E-11 | microtubule-based movement                                            |
| 7264  | 70/ 232               | 1.98E-11 | 50/ 396               | 6.39E-06 | small GTPase mediated signal transduction                             |
| 16192 | 33/ 81                | 2.51E-11 | 21/ 140               | 1.14E-04 | vesicle-mediated transport                                            |
| 15992 | 34/ 87                | 9.21E-11 | 23/ 93                | 1.23E-11 | proton transport                                                      |
| 51258 | 18/ 25                | 1.96E-10 | 10/ 26                | 5.49E-06 | protein polymerization                                                |
| 6096  | 26/ 61                | 4.87E-10 | 21/ 83                | 3.79E-11 | glycolysis                                                            |
| 15031 | 76/ 300               | 1.31E-07 | 103/ 870              | 1.16E-08 | protein transport                                                     |
| 6607  | 16/ 35                | 1.35E-07 | 2/ 3                  | 1.42E-02 | NLS-bearing substrate import into nucleus                             |
| 6887  | 17/ 39                | 2.14E-07 | 11/ 81                | 1.07E-02 | exocytosis                                                            |
| 6811  | 91/ 381               | 2.70E-07 | 115/ 778              | 0.00E+00 | ion transport                                                         |
| 7269  | 13/ 22                | 2.19E-06 | 7/ 47                 | 4.50E-02 | neurotransmitter secretion                                            |
| 6813  | 45/ 173               | 1.65E-05 | 58/ 281               | 0.00E+00 | potassium ion transport                                               |
| 8152  | 87/ 392               | 1.78E-05 | 63/ 619               | 1.06E-03 | metabolism                                                            |
| 6457  | 63/ 268               | 2.94E-05 | 38/ 397               | 2.39E-02 | protein folding                                                       |
| 7254  | 13/ 33                | 3.57E-05 | 6/ 30                 | 1.66E-02 | JNK cascade                                                           |
| 6413  | 14/ 37                | 4.09E-05 | 11/ 61                | 3.93E-04 | translational initiation                                              |
| 7242  | 87/ 420               | 3.12E-04 | 117/ 834              | 8.33E-16 | intracellular signaling cascade                                       |
| 6470  | 44/ 188               | 4.52E-04 | 39/ 278               | 2.46E-06 | protein amino acid dephosphorylation                                  |
| 6897  | 29/ 113               | 5.85E-04 | 25/ 239               | 1.91E-02 | endocytosis                                                           |
| 7268  | 54/ 244               | 6.34E-04 | 16/ 123               | 4.79E-03 | synaptic transmission                                                 |
| 46777 | 9/ 19                 | 7.72E-04 | 9/ 57                 | 1.75E-02 | protein amino acid autophosphorylation                                |
| 7017  | 7/ 14                 | 2.06E-03 | 30/ 142               | 2.49E-11 | microtubule-based process                                             |
| 6754  | 3/ 3                  | 3.26E-03 | 18/ 55                | 4.65E-14 | ATP biosynthesis                                                      |
| 6816  | 29/ 126               | 4.80E-03 | 25/ 201               | 1.36E-03 | calcium ion transport                                                 |
| 16055 | 18/ 72                | 7.55E-03 | 33/ 209               | 3.61E-07 | Wnt receptor signaling pathway                                        |
| 30182 | 4/ 7                  | 1.16E-02 | 10/ 49                | 1.91E-03 | neuron differentiation                                                |
| 1558  | 25/ 116               | 2.07E-02 | 20/ 133               | 1.53E-04 | regulation of cell growth                                             |
| 1764  | 2/ 2                  | 2.20E-02 | 12/ 98                | 2.19E-02 | neuron migration                                                      |
| 7026  | 5/ 12                 | 2.29E-02 | 6/ 33                 | 2.59E-02 | negative regulation of microtubule depolymerization                   |
| 7205  | 9/ 30                 | 2.60E-02 | 4/ 19                 | 4.05E-02 | protein kinase C activation                                           |
| 6810  | 91/ 511               | 2.80E-02 | 332/ 2903             | 0.00E+00 | transport                                                             |
| 165   | 8/ 26                 | 3.02E-02 | 10/ 51                | 2.62E-03 | MAPKKK cascade                                                        |
| 6725  | 6/ 17                 | 3.03E-02 | 7/ 28                 | 2.70E-03 | aromatic compound metabolism                                          |
| 7411  | 11/ 45                | 3.48E-02 | 17/ 133               | 4.77E-03 | axon guidance                                                         |
| 7185  | 7/ 22                 | 3.49E-02 | 14/ 63                | 1.22E-06 | transmembrane receptor protein tyrosine phosphatase signaling pathway |
| 6812  | 36/ 187               | 4.41E-02 | 44/ 300               | 1.11E-07 | cation transport                                                      |
| 7214  | 5/ 14                 | 4.48E-02 | 6/ 31                 | 1.94E-02 | gamma-aminobutyric acid signaling pathway                             |
| 6468  | 124/ 731              | 5.00E-02 | 145/ 1176             | 3.38E-13 | protein amino acid phosphorylation                                    |

C: human caudate-cerebellum and mouse striatum-cerebellum GO processes containing probesets with reduced RNA levels in human caudate and mouse striatum compared with human and mouse cerebellum respectively

| GO ID | Human                 |          | Mouse                 |          | Function                                                             |
|-------|-----------------------|----------|-----------------------|----------|----------------------------------------------------------------------|
|       | # sig/total probesets | p-value  | # sig/total probesets | p-value  |                                                                      |
| 398   | 97/ 170               | 0.00E+00 | 54/ 308               | 2.29E-07 | nuclear mRNA splicing via spliceosome                                |
| 6397  | 51/ 90                | 5.55E-17 | 80/ 424               | 3.01E-12 | mRNA processing                                                      |
| 8380  | 55/ 111               | 5.16E-14 | 5/ 17                 | 1.61E-02 | RNA splicing                                                         |
| 6350  | 424/ 1530             | 6.16E-12 | 381/ 2571             | 0.00E+00 | transcription                                                        |
| 6406  | 34/ 62                | 2.39E-11 | 9/ 42                 | 1.31E-02 | mRNA export from nucleus                                             |
| 6355  | 470/ 1819             | 3.53E-08 | 472/ 3442             | 0.00E+00 | regulation of transcription DNA-dependent                            |
| 6512  | 102/ 306              | 3.74E-08 | 93/ 795               | 7.85E-03 | ubiquitin cycle                                                      |
| 6260  | 53/ 162               | 1.05E-04 | 41/ 214               | 2.54E-07 | DNA replication                                                      |
| 6281  | 53/ 162               | 1.05E-04 | 53/ 333               | 1.20E-05 | DNA repair                                                           |
| 6396  | 25/ 64                | 1.75E-04 | 21/ 109               | 1.48E-04 | RNA processing                                                       |
| 6913  | 11/ 22                | 3.95E-04 | 13/ 40                | 1.86E-07 | nucleocytoplasmic transport                                          |
| 165   | 12/ 26                | 7.72E-04 | 9/ 51                 | 4.23E-02 | MAPKKK cascade                                                       |
| 16567 | 76/ 266               | 1.00E-03 | 51/ 426               | 2.52E-02 | protein ubiquitination                                               |
| 6310  | 23/ 63                | 1.15E-03 | 12/ 58                | 1.29E-03 | DNA recombination                                                    |
| 122   | 30/ 91                | 2.31E-03 | 29/ 183               | 9.90E-04 | negative regulation of transcription from RNA polymerase II promoter |
| 9790  | 11/ 27                | 5.63E-03 | 6/ 26                 | 2.84E-02 | embryonic development                                                |
| 46777 | 9/ 19                 | 9.00E-03 | 10/ 57                | 3.47E-02 | protein amino acid autophosphorylation                               |
| 6916  | 40/ 142               | 1.65E-02 | 22/ 129               | 1.07E-03 | anti-apoptosis                                                       |
| 6887  | 13/ 39                | 2.81E-02 | 12/ 81                | 4.14E-02 | exocytosis                                                           |
| 6511  | 40/ 149               | 3.70E-02 | 32/ 257               | 3.73E-02 | ubiquitin-dependent protein catabolism                               |
| 15986 | 16/ 53                | 4.82E-02 | 11/ 60                | 7.46E-03 | ATP synthesis coupled proton transport                               |

D: human caudate-cerebellum and mouse striatum-cerebellum GO processes containing probesets with increased RNA levels in human caudate and mouse striatum compared with human and mouse cerebellum respectively

| GO ID | Human                 |          | Mouse                 |          | Function                                                         |
|-------|-----------------------|----------|-----------------------|----------|------------------------------------------------------------------|
|       | # sig/total probesets | p-value  | # sig/total probesets | p-value  |                                                                  |
| 7399  | 131/ 410              | 3.45E-10 | 59/ 312               | 1.69E-12 | nervous system development                                       |
| 7155  | 172/ 574              | 4.71E-10 | 103/ 828              | 2.81E-06 | cell adhesion                                                    |
| 7242  | 132/ 420              | 1.16E-09 | 128/ 834              | 9.77E-15 | intracellular signaling cascade                                  |
| 7268  | 81/ 244               | 8.45E-08 | 21/ 123               | 1.50E-04 | synaptic transmission                                            |
| 7169  | 43/ 122               | 1.04E-05 | 30/ 123               | 2.28E-11 | transmembrane receptor protein tyrosine kinase signaling pathway |
| 8152  | 109/ 392              | 3.82E-05 | 89/ 619               | 6.34E-09 | metabolism                                                       |
| 6813  | 55/ 173               | 4.20E-05 | 32/ 281               | 2.37E-02 | potassium ion transport                                          |
| 6811  | 102/ 381              | 3.52E-04 | 76/ 778               | 4.91E-02 | ion transport                                                    |
| 30154 | 98/ 369               | 6.19E-04 | 74/ 624               | 3.38E-04 | cell differentiation                                             |
| 16042 | 23/ 65                | 8.70E-04 | 14/ 99                | 1.48E-02 | lipid catabolism                                                 |
| 9968  | 21/ 58                | 9.22E-04 | 24/ 70                | 6.66E-16 | negative regulation of signal transduction                       |
| 8360  | 14/ 34                | 9.37E-04 | 19/ 118               | 8.01E-04 | regulation of cell shape                                         |
| 6835  | 8/ 14                 | 2.31E-03 | 7/ 23                 | 1.82E-03 | dicarboxylic acid transport                                      |
| 30308 | 16/ 44                | 3.09E-03 | 2/ 4                  | 3.57E-02 | negative regulation of cell growth                               |
| 6629  | 75/ 286               | 3.51E-03 | 44/ 293               | 8.48E-06 | lipid metabolism                                                 |
| 6928  | 48/ 171               | 3.62E-03 | 10/ 61                | 2.51E-02 | cell motility                                                    |
| 42135 | 7/ 12                 | 3.78E-03 | 3/ 8                  | 2.22E-02 | neurotransmitter catabolism                                      |
| 7264  | 61/ 232               | 7.11E-03 | 68/ 396               | 2.35E-11 | small GTPase mediated signal transduction                        |
| 6470  | 50/ 188               | 1.05E-02 | 51/ 278               | 2.44E-10 | protein amino acid dephosphorylation                             |
| 1516  | 7/ 14                 | 1.13E-02 | 3/ 10                 | 4.21E-02 | prostaglandin biosynthesis                                       |
| 6687  | 6/ 11                 | 1.13E-02 | 2/ 4                  | 3.57E-02 | glycosphingolipid metabolism                                     |
| 7218  | 21/ 68                | 1.16E-02 | 25/ 127               | 1.01E-06 | neuropeptide signaling pathway                                   |
| 188   | 10/ 24                | 1.21E-02 | 8/ 34                 | 5.16E-03 | inactivation of MAPK activity                                    |
| 6631  | 25/ 85                | 1.39E-02 | 18/ 108               | 6.12E-04 | fatty acid metabolism                                            |
| 7165  | 376/ 1715             | 1.45E-02 | 184/ 1382             | 5.84E-13 | signal transduction                                              |
| 45786 | 39/ 144               | 1.52E-02 | 21/ 115               | 3.72E-05 | negative regulation of progression through cell cycle            |
| 74    | 82/ 337               | 2.00E-02 | 51/ 407               | 6.07E-04 | regulation of progression through cell cycle                     |
| 8015  | 23/ 79                | 2.00E-02 | 4/ 12                 | 1.29E-02 | circulation                                                      |
| 8154  | 6/ 13                 | 2.93E-02 | 4/ 16                 | 3.64E-02 | actin polymerization and/or depolymerization                     |
| 7411  | 14/ 45                | 2.97E-02 | 23/ 133               | 5.83E-05 | axon guidance                                                    |
| 50730 | 4/ 7                  | 3.28E-02 | 10/ 32                | 1.56E-04 | regulation of peptidyl-tyrosine phosphorylation                  |
| 6936  | 33/ 126               | 3.81E-02 | 12/ 44                | 1.80E-06 | muscle contraction                                               |
| 1578  | 2/ 2                  | 3.96E-02 | 4/ 16                 | 3.64E-02 | microtubule bundle formation                                     |
| 7032  | 2/ 2                  | 3.96E-02 | 4/ 15                 | 2.91E-02 | endosome organization and biogenesis                             |
| 1502  | 6/ 14                 | 4.29E-02 | 4/ 17                 | 4.46E-02 | cartilage condensation                                           |
| 7214  | 6/ 14                 | 4.29E-02 | 7/ 31                 | 1.10E-02 | gamma-aminobutyric acid signaling pathway                        |
| 16477 | 10/ 29                | 4.77E-02 | 11/ 76                | 2.21E-02 | cell migration                                                   |
| 8366  | 5/ 11                 | 4.94E-02 | 8/ 17                 | 2.42E-05 | nerve ensheathment                                               |

E: human cortex-cerebellum and mouse cortex-cerebellum GO processes containing probesets with reduced RNA levels in human and mouse cortex compared with human and mouse cerebellum respectively

| GO ID | Human                 |          | Mouse                 |          | Function                                                             |
|-------|-----------------------|----------|-----------------------|----------|----------------------------------------------------------------------|
|       | # sig/total probesets | p-value  | # sig/total probesets | p-value  |                                                                      |
| 398   | 96/ 170               | 0.00E+00 | 79/ 308               | 0.00E+00 | nuclear mRNA splicing via spliceosome                                |
| 8380  | 55/ 111               | 2.00E-14 | 6/ 17                 | 2.91E-03 | RNA splicing                                                         |
| 6350  | 429/ 1530             | 4.40E-14 | 403/ 2571             | 0.00E+00 | transcription                                                        |
| 6397  | 47/ 90                | 5.30E-14 | 106/ 424              | 0.00E+00 | mRNA processing                                                      |
| 6406  | 36/ 62                | 1.39E-13 | 8/ 42                 | 3.37E-02 | mRNA export from nucleus                                             |
| 6355  | 474/ 1819             | 9.34E-10 | 507/ 3442             | 0.00E+00 | regulation of transcription DNA-dependent                            |
| 6281  | 61/ 162               | 3.57E-08 | 48/ 333               | 3.68E-04 | DNA repair                                                           |
| 6396  | 29/ 64                | 4.90E-07 | 29/ 109               | 1.04E-10 | RNA processing                                                       |
| 6260  | 58/ 162               | 7.84E-07 | 61/ 214               | 0.00E+00 | DNA replication                                                      |
| 6376  | 13/ 20                | 2.10E-05 | 17/ 60                | 1.12E-07 | mRNA splice site selection                                           |
| 6310  | 25/ 63                | 8.82E-05 | 11/ 58                | 4.53E-03 | DNA recombination                                                    |
| 184   | 11/ 19                | 4.03E-04 | 7/ 19                 | 9.73E-04 | mRNA catabolism nonsense-mediated decay                              |
| 6913  | 12/ 22                | 4.62E-04 | 11/ 40                | 2.63E-05 | nucleocytoplasmic transport                                          |
| 6357  | 86/ 312               | 1.09E-03 | 30/ 185               | 3.82E-04 | regulation of transcription from RNA polymerase II promoter          |
| 122   | 30/ 91                | 1.73E-03 | 31/ 183               | 1.13E-04 | negative regulation of transcription from RNA polymerase II promoter |
| 6730  | 17/ 45                | 2.17E-03 | 21/ 69                | 3.63E-10 | one-carbon compound metabolism                                       |
| 6270  | 11/ 26                | 3.08E-03 | 8/ 28                 | 2.77E-03 | DNA replication initiation                                           |
| 6512  | 82/ 306               | 3.47E-03 | 86/ 795               | 4.57E-02 | ubiquitin cycle                                                      |
| 8016  | 11/ 32                | 2.69E-02 | 7/ 27                 | 8.98E-03 | regulation of heart contraction                                      |
| 6605  | 16/ 51                | 2.84E-02 | 34/ 277               | 3.32E-02 | protein targeting                                                    |
| 6364  | 18/ 60                | 3.57E-02 | 14/ 68                | 4.98E-04 | rRNA processing                                                      |
| 16567 | 66/ 266               | 4.37E-02 | 56/ 426               | 1.82E-03 | protein ubiquitination                                               |

F: human cortex-cerebellum and mouse striatum-cerebellum GO processes containing probesets with increased RNA levels in human and mouse cortex compared with human and mouse cerebellum respectively

| GO ID | Human                 |          | Mouse                 |          | Function                                                         |
|-------|-----------------------|----------|-----------------------|----------|------------------------------------------------------------------|
|       | # sig/total probesets | p-value  | # sig/total probesets | p-value  |                                                                  |
| 7268  | 102/ 244              | 1.08E-11 | 21/ 123               | 2.83E-04 | synaptic transmission                                            |
| 7018  | 37/ 71                | 8.31E-09 | 23/ 140               | 3.32E-04 | microtubule-based movement                                       |
| 6813  | 69/ 173               | 2.42E-07 | 41/ 281               | 1.00E-04 | potassium ion transport                                          |
| 7264  | 87/ 232               | 3.23E-07 | 80/ 396               | 0.00E+00 | small GTPase mediated signal transduction                        |
| 6886  | 110/ 310              | 4.28E-07 | 71/ 491               | 7.07E-07 | intracellular protein transport                                  |
| 7399  | 139/ 410              | 4.48E-07 | 73/ 312               | 0.00E+00 | nervous system development                                       |
| 6695  | 19/ 32                | 1.00E-06 | 17/ 47                | 3.93E-12 | cholesterol biosynthesis                                         |
| 7242  | 139/ 420              | 2.31E-06 | 136/ 834              | 5.55E-17 | intracellular signaling cascade                                  |
| 8152  | 131/ 392              | 2.38E-06 | 82/ 619               | 7.45E-06 | metabolism                                                       |
| 6811  | 125/ 381              | 1.19E-05 | 101/ 778              | 2.17E-06 | ion transport                                                    |
| 7155  | 171/ 574              | 2.43E-04 | 116/ 828              | 3.01E-09 | cell adhesion                                                    |
| 6470  | 64/ 188               | 3.96E-04 | 52/ 278               | 3.33E-10 | protein amino acid dephosphorylation                             |
| 6457  | 86/ 268               | 5.63E-04 | 53/ 397               | 2.05E-04 | protein folding                                                  |
| 16126 | 7/ 9                  | 9.44E-04 | 14/ 40                | 7.50E-10 | sterol biosynthesis                                              |
| 15986 | 22/ 53                | 1.12E-03 | 12/ 60                | 6.36E-04 | ATP synthesis coupled proton transport                           |
| 6928  | 57/ 171               | 1.44E-03 | 13/ 61                | 1.49E-04 | cell motility                                                    |
| 7165  | 454/ 1715             | 2.33E-03 | 202/ 1382             | 0.00E+00 | signal transduction                                              |
| 7215  | 11/ 20                | 2.48E-03 | 3/ 8                  | 2.44E-02 | glutamate signaling pathway                                      |
| 7169  | 42/ 122               | 2.56E-03 | 25/ 123               | 1.03E-06 | transmembrane receptor protein tyrosine kinase signaling pathway |
| 6812  | 60/ 187               | 3.32E-03 | 38/ 300               | 4.14E-03 | cation transport                                                 |
| 7411  | 18/ 45                | 4.98E-03 | 25/ 133               | 8.47E-06 | axon guidance                                                    |
| 188   | 11/ 24                | 5.33E-03 | 7/ 34                 | 2.15E-02 | inactivation of MAPK activity                                    |
| 7548  | 11/ 24                | 5.33E-03 | 7/ 26                 | 4.75E-03 | sex differentiation                                              |
| 9968  | 21/ 58                | 1.23E-02 | 25/ 70                | 1.11E-16 | negative regulation of signal transduction                       |
| 6084  | 4/ 5                  | 1.27E-02 | 4/ 10                 | 7.03E-03 | acetyl-CoA metabolism                                            |
| 42552 | 4/ 5                  | 1.27E-02 | 8/ 27                 | 1.32E-03 | myelination                                                      |
| 17157 | 3/ 3                  | 1.33E-02 | 7/ 18                 | 4.19E-04 | regulation of exocytosis                                         |
| 30517 | 3/ 3                  | 1.33E-02 | 4/ 14                 | 2.55E-02 | negative regulation of axon extension                            |
| 8610  | 6/ 10                 | 1.51E-02 | 27/ 137               | 1.02E-06 | lipid biosynthesis                                               |
| 15992 | 29/ 87                | 1.69E-02 | 22/ 93                | 6.36E-08 | proton transport                                                 |
| 6468  | 197/ 731              | 1.73E-02 | 174/ 1176             | 9.99E-16 | protein amino acid phosphorylation                               |
| 7266  | 12/ 30                | 1.77E-02 | 11/ 67                | 9.39E-03 | Rho protein signal transduction                                  |
| 30866 | 7/ 13                 | 1.81E-02 | 9/ 32                 | 1.01E-03 | cortical actin cytoskeleton organization and biogenesis          |
| 7218  | 23/ 68                | 2.44E-02 | 29/ 127               | 2.57E-09 | neuropeptide signaling pathway                                   |
| 45786 | 44/ 144               | 2.58E-02 | 19/ 115               | 9.02E-04 | negative regulation of progression through cell cycle            |
| 6936  | 39/ 126               | 2.71E-02 | 10/ 44                | 3.12E-03 | muscle contraction                                               |
| 6835  | 7/ 14                 | 2.89E-02 | 7/ 23                 | 2.22E-03 | dicarboxylic acid transport                                      |
| 6887  | 14/ 39                | 3.63E-02 | 14/ 81                | 2.09E-03 | exocytosis                                                       |
| 6182  | 6/ 12                 | 4.26E-02 | 4/ 12                 | 1.44E-02 | cGMP biosynthesis                                                |
| 30154 | 101/ 369              | 4.64E-02 | 83/ 624               | 5.49E-06 | cell differentiation                                             |
